# Supplementary material for: Atrial Fibrillation and the Risk of Early‐Onset Dementia: A Systematic Review and Meta‐Analysis
Source: PubMed Central journal article supplement — J Am Heart Assoc. 2022 Jul 15;11(14):e025653. doi: 10.1161/JAHA.122.025653 (PMC9707836; doi:10.1161/jaha.122.025653), 2022-07-15
Supplement: JAH3-11-e025653-s001.pdf [file JAH3-11-e025653-s001.pdf]

# **SUPPLEMENTAL MATERIAL**

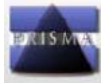

## PRISMA 2020 Checklist

| Section and Topic             | Item # | Checklist item                                                                                                                                                                                                                                                                                       | Location where item is reported |
|-------------------------------|--------|------------------------------------------------------------------------------------------------------------------------------------------------------------------------------------------------------------------------------------------------------------------------------------------------------|---------------------------------|
| <b>TITLE</b>                  |        |                                                                                                                                                                                                                                                                                                      |                                 |
| Title                         | 1      | Identify the report as a systematic review.                                                                                                                                                                                                                                                          | P1,P3,P6                        |
| <b>ABSTRACT</b>               |        |                                                                                                                                                                                                                                                                                                      |                                 |
| Abstract                      | 2      | See the PRISMA 2020 for Abstracts checklist.                                                                                                                                                                                                                                                         | See below                       |
| <b>INTRODUCTION</b>           |        |                                                                                                                                                                                                                                                                                                      |                                 |
| Rationale                     | 3      | Describe the rationale for the review in the context of existing knowledge.                                                                                                                                                                                                                          | P5-6                            |
| Objectives                    | 4      | Provide an explicit statement of the objective(s) or question(s) the review addresses.                                                                                                                                                                                                               | P6                              |
| <b>METHODS</b>                |        |                                                                                                                                                                                                                                                                                                      |                                 |
| Eligibility criteria          | 5      | Specify the inclusion and exclusion criteria for the review and how studies were grouped for the syntheses.                                                                                                                                                                                          | P6                              |
| Information sources           | 6      | Specify all databases, registers, websites, organisations, reference lists and other sources searched or consulted to identify studies. Specify the date when each source was last searched or consulted.                                                                                            | P6                              |
| Search strategy               | 7      | Present the full search strategies for all databases, registers and websites, including any filters and limits used.                                                                                                                                                                                 | Table S1                        |
| Selection process             | 8      | Specify the methods used to decide whether a study met the inclusion criteria of the review, including how many reviewers screened each record and each report retrieved, whether they worked independently, and if applicable, details of automation tools used in the process.                     | P6-7                            |
| Data collection process       | 9      | Specify the methods used to collect data from reports, including how many reviewers collected data from each report, whether they worked independently, any processes for obtaining or confirming data from study investigators, and if applicable, details of automation tools used in the process. | P6                              |
| Data items                    | 10a    | List and define all outcomes for which data were sought. Specify whether all results that were compatible with each outcome domain in each study were sought (e.g. for all measures, time points, analyses), and if not, the methods used to decide which results to collect.                        | P7                              |
|                               | 10b    | List and define all other variables for which data were sought (e.g. participant and intervention characteristics, funding sources). Describe any assumptions made about any missing or unclear information.                                                                                         | P7                              |
| Study risk of bias assessment | 11     | Specify the methods used to assess risk of bias in the included studies, including details of the tool(s) used, how many reviewers assessed each study and whether they worked independently, and if applicable, details of automation tools used in the process.                                    | P7                              |
| Effect measures               | 12     | Specify for each outcome the effect measure(s) (e.g. risk ratio, mean difference) used in the synthesis or presentation of results.                                                                                                                                                                  | P7                              |
| Synthesis methods             | 13a    | Describe the processes used to decide which studies were eligible for each synthesis (e.g. tabulating the study intervention characteristics and comparing against the planned groups for each synthesis (item #5)).                                                                                 | P6                              |
|                               | 13b    | Describe any methods required to prepare the data for presentation or synthesis, such as handling of missing summary statistics, or data conversions.                                                                                                                                                | P7                              |
|                               | 13c    | Describe any methods used to tabulate or visually display results of individual studies and syntheses.                                                                                                                                                                                               | P7                              |
|                               | 13d    | Describe any methods used to synthesize results and provide a rationale for the choice(s). If meta-analysis was performed, describe the model(s), method(s) to identify the presence and extent of statistical heterogeneity, and software package(s) used.                                          | P7-8                            |
|                               | 13e    | Describe any methods used to explore possible causes of heterogeneity among study results (e.g. subgroup analysis, meta-regression).                                                                                                                                                                 | P7-8                            |
|                               | 13f    | Describe any sensitivity analyses conducted to assess robustness of the synthesized results.                                                                                                                                                                                                         | P8                              |
| Reporting bias assessment     | 14     | Describe any methods used to assess risk of bias due to missing results in a synthesis (arising from reporting biases).                                                                                                                                                                              | P6-7, Table S2                  |
| Certainty assessment          | 15     | Describe any methods used to assess certainty (or confidence) in the body of evidence for an outcome.                                                                                                                                                                                                | Not assessed                    |

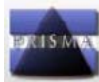

# PRISMA 2020 Checklist

| Section and Topic                              | Item # | Checklist item                                                                                                                                                                                                                                                                       | Location where item is reported |
|------------------------------------------------|--------|--------------------------------------------------------------------------------------------------------------------------------------------------------------------------------------------------------------------------------------------------------------------------------------|---------------------------------|
| <b>RESULTS</b>                                 |        |                                                                                                                                                                                                                                                                                      |                                 |
| Study selection                                | 16a    | Describe the results of the search and selection process, from the number of records identified in the search to the number of studies included in the review, ideally using a flow diagram.                                                                                         | P8                              |
|                                                | 16b    | Cite studies that might appear to meet the inclusion criteria, but which were excluded, and explain why they were excluded.                                                                                                                                                          | Figure 1                        |
| Study characteristics                          | 17     | Cite each included study and present its characteristics.                                                                                                                                                                                                                            | P8-9, Tables 1 and S3           |
| Risk of bias in studies                        | 18     | Present assessments of risk of bias for each included study.                                                                                                                                                                                                                         | Table S4                        |
| Results of individual studies                  | 19     | For all outcomes, present, for each study: (a) summary statistics for each group (where appropriate) and (b) an effect estimate and its precision (e.g. confidence/credible interval), ideally using structured tables or plots.                                                     | Figures 2-4                     |
| Results of syntheses                           | 20a    | For each synthesis, briefly summarise the characteristics and risk of bias among contributing studies.                                                                                                                                                                               | P8-9, Table S4                  |
|                                                | 20b    | Present results of all statistical syntheses conducted. If meta-analysis was done, present for each the summary estimate and its precision (e.g. confidence/credible interval) and measures of statistical heterogeneity. If comparing groups, describe the direction of the effect. | P9-10, Figure 2-5               |
|                                                | 20c    | Present results of all investigations of possible causes of heterogeneity among study results.                                                                                                                                                                                       | P9-10                           |
|                                                | 20d    | Present results of all sensitivity analyses conducted to assess the robustness of the synthesized results.                                                                                                                                                                           | P9-10, Fig.3-4                  |
| Reporting biases                               | 21     | Present assessments of risk of bias due to missing results (arising from reporting biases) for each synthesis assessed.                                                                                                                                                              | Table S4                        |
| Certainty of evidence                          | 22     | Present assessments of certainty (or confidence) in the body of evidence for each outcome assessed.                                                                                                                                                                                  | Not reported                    |
| <b>DISCUSSION</b>                              |        |                                                                                                                                                                                                                                                                                      |                                 |
| Discussion                                     | 23a    | Provide a general interpretation of the results in the context of other evidence.                                                                                                                                                                                                    | P10-11                          |
|                                                | 23b    | Discuss any limitations of the evidence included in the review.                                                                                                                                                                                                                      | P11-12                          |
|                                                | 23c    | Discuss any limitations of the review processes used.                                                                                                                                                                                                                                | P12                             |
|                                                | 23d    | Discuss implications of the results for practice, policy, and future research.                                                                                                                                                                                                       | P12                             |
| <b>OTHER INFORMATION</b>                       |        |                                                                                                                                                                                                                                                                                      |                                 |
| Registration and protocol                      | 24a    | Provide registration information for the review, including register name and registration number, or state that the review was not registered.                                                                                                                                       | Not registered                  |
|                                                | 24b    | Indicate where the review protocol can be accessed, or state that a protocol was not prepared.                                                                                                                                                                                       | Not available                   |
|                                                | 24c    | Describe and explain any amendments to information provided at registration or in the protocol.                                                                                                                                                                                      | Not applicable                  |
| Support                                        | 25     | Describe sources of financial or non-financial support for the review, and the role of the funders or sponsors in the review.                                                                                                                                                        | P13                             |
| Competing interests                            | 26     | Declare any competing interests of review authors.                                                                                                                                                                                                                                   | P13                             |
| Availability of data, code and other materials | 27     | Report which of the following are publicly available and where they can be found: template data collection forms; data extracted from included studies; data used for all analyses; analytic code; any other materials used in the review.                                           | P6, P8                          |

From: Page MJ, McKenzie JE, Bossuyt PM, Boutron I, Hoffmann TC, Mulrow CD, et al. The PRISMA 2020 statement: an updated guideline for reporting systematic reviews. *BMJ* 2021;372:n71. doi: 10.1136/bmj.n71

For more information, visit: <http://www.prisma-statement.org/>

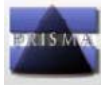

## PRISMA 2020 for Abstracts Checklist

| Section and Topic       | Item # | Checklist item                                                                                                                                                                                                                                                                                        | Reported (Yes/No) |
|-------------------------|--------|-------------------------------------------------------------------------------------------------------------------------------------------------------------------------------------------------------------------------------------------------------------------------------------------------------|-------------------|
| <b>TITLE</b>            |        |                                                                                                                                                                                                                                                                                                       |                   |
| Title                   | 1      | Identify the report as a systematic review.                                                                                                                                                                                                                                                           | yes               |
| <b>BACKGROUND</b>       |        |                                                                                                                                                                                                                                                                                                       |                   |
| Objectives              | 2      | Provide an explicit statement of the main objective(s) or question(s) the review addresses.                                                                                                                                                                                                           | yes               |
| <b>METHODS</b>          |        |                                                                                                                                                                                                                                                                                                       |                   |
| Eligibility criteria    | 3      | Specify the inclusion and exclusion criteria for the review.                                                                                                                                                                                                                                          | yes               |
| Information sources     | 4      | Specify the information sources (e.g. databases, registers) used to identify studies and the date when each was last searched.                                                                                                                                                                        | yes               |
| Risk of bias            | 5      | Specify the methods used to assess risk of bias in the included studies.                                                                                                                                                                                                                              | no                |
| Synthesis of results    | 6      | Specify the methods used to present and synthesise results.                                                                                                                                                                                                                                           | yes               |
| <b>RESULTS</b>          |        |                                                                                                                                                                                                                                                                                                       |                   |
| Included studies        | 7      | Give the total number of included studies and participants and summarise relevant characteristics of studies.                                                                                                                                                                                         | yes               |
| Synthesis of results    | 8      | Present results for main outcomes, preferably indicating the number of included studies and participants for each. If meta-analysis was done, report the summary estimate and confidence/credible interval. If comparing groups, indicate the direction of the effect (i.e. which group is favoured). | yes               |
| <b>DISCUSSION</b>       |        |                                                                                                                                                                                                                                                                                                       |                   |
| Limitations of evidence | 9      | Provide a brief summary of the limitations of the evidence included in the review (e.g. study risk of bias, inconsistency and imprecision).                                                                                                                                                           | yes               |
| Interpretation          | 10     | Provide a general interpretation of the results and important implications.                                                                                                                                                                                                                           | yes               |
| <b>OTHER</b>            |        |                                                                                                                                                                                                                                                                                                       |                   |
| Funding                 | 11     | Specify the primary source of funding for the review.                                                                                                                                                                                                                                                 | no                |
| Registration            | 12     | Provide the register name and registration number.                                                                                                                                                                                                                                                    | no                |

From: Page MJ, McKenzie JE, Bossuyt PM, Boutron I, Hoffmann TC, Mulrow CD, et al. The PRISMA 2020 statement: an updated guideline for reporting systematic reviews. *BMJ* 2021;372:n71. doi: 10.1136/bmj.n71

For more information, visit: <http://www.prisma-statement.org/>

**Table S1.** Literature search on online databases.

| <b>Database</b> | <b>Search</b>                                                                                                                                                                                                                                                                                                                                                                                                                                                                                                                                                                                                                                                                                                                       |
|-----------------|-------------------------------------------------------------------------------------------------------------------------------------------------------------------------------------------------------------------------------------------------------------------------------------------------------------------------------------------------------------------------------------------------------------------------------------------------------------------------------------------------------------------------------------------------------------------------------------------------------------------------------------------------------------------------------------------------------------------------------------|
| <b>Pubmed</b>   | ('Atrial fibrillation [Mesh] OR 'heart atrium arrhythmia' OR 'arrhythmia, atrial' OR 'atrial arrhythmia' OR 'atrium arrhythmia' OR 'heart atrial arrhythmia' OR 'heart atrium arrhythmia' OR 'atrial fibrillation' OR 'atrial fibrillation' OR 'atrium fibrillation' OR 'auricular fibrillation' OR 'auricular fibrillation' OR 'cardiac atrial fibrillation' OR 'cardiac atrium fibrillation' OR 'fibrillation, heart atrium' OR 'heart atrial fibrillation' OR 'heart atrium fibrillation' OR 'heart fibrillation atrium' OR 'non-valvular atrial fibrillation' OR 'nonvalvular atrial fibrillation') AND ('dementia' [Mesh] OR 'dementia' OR 'amentia' OR 'dementia' OR 'demention' OR 'Alzheimer' OR 'frontotemporal dementia') |
| <b>Scopus</b>   | 'Atrial fibrillation' AND (dementia OR 'Alzheimer Disease' OR 'frontotemporal dementia')                                                                                                                                                                                                                                                                                                                                                                                                                                                                                                                                                                                                                                            |
| <b>Embase</b>   | ('heart atrium arrhythmia'/mj OR 'arrhythmia, atrial' OR 'atrial arrhythmia' OR 'atrium arrhythmia' OR 'heart atrial arrhythmia' OR 'heart atrium arrhythmia' OR 'atrial fibrillation'/mj OR 'atrial fibrillation' OR 'atrium fibrillation' OR 'auricular fibrillation' OR 'auricular fibrillation' OR 'cardiac atrial fibrillation' OR 'cardiac atrium fibrillation' OR 'fibrillation, heart atrium' OR 'heart atrial fibrillation' OR 'heart atrium fibrillation' OR 'heart fibrillation atrium' OR 'non-valvular atrial fibrillation' OR 'nonvalvular atrial fibrillation') AND ('dementia'/mj OR 'amentia' OR 'dementia' OR 'demention')                                                                                        |

**Table S2.** Criteria adopted for risk of bias assessment using Risk of Bias for in Non-randomized Studies of Exposures (ROBINS-E) tool.

| Domains                                     | Criteria                                                                                                                                                                                                                                                                                                                                                                                                                                                                                                                                                                                                                                                                                 |
|---------------------------------------------|------------------------------------------------------------------------------------------------------------------------------------------------------------------------------------------------------------------------------------------------------------------------------------------------------------------------------------------------------------------------------------------------------------------------------------------------------------------------------------------------------------------------------------------------------------------------------------------------------------------------------------------------------------------------------------------|
| Bias due to confounding                     | Studies are considered at <b>moderate</b> risk of bias if they considered age in the confounding factors. Studies are considered at <b>low</b> risk of bias if they considered the educational attainment in the adjustment factors. Studies are considered at <b>high</b> risk of bias if adjusting factors are not reported.                                                                                                                                                                                                                                                                                                                                                           |
| Bias in selecting participants in the study | Studies are considered at <b>low</b> risk of bias if selection of eligible dementia cases was independent of the diagnosis of atrial fibrillation. Studies are considered at <b>moderate</b> risk of bias if selection of cases from a population at higher risk of dementia (e.g. mild cognitive impairment). Studies are considered at <b>high</b> risk of bias if the modality of selection of participants is not specified.                                                                                                                                                                                                                                                         |
| Bias in exposure classification             | Studies are considered at <b>low</b> risk of bias if the assessment of atrial fibrillation was through electrocardiography (ECGs) at baseline and at each follow-up examination or through medical records, with a discharge diagnosis or at least confirmed twice. Studies are considered at <b>moderate</b> risk of bias if exposure assessment was performed relying on self-reports, but afterwards the exposure was confirmed through medical records. Studies are considered at <b>high</b> risk of bias if they relied only on self-report for exposure classification or criteria are not reported.                                                                              |
| Bias in departure from intended exposure    | This domain should not of concerns since the exposure is presence of atrial fibrillation, thus departure from the intended exposure is not an issue. As consequence, all studies are considered at low risk of bias for this domain.                                                                                                                                                                                                                                                                                                                                                                                                                                                     |
| Bias due to missing data                    | Studies are considered at <b>low</b> risk of bias if less than 10% of participants were excluded to missing data, while at <b>moderate</b> risk of bias if less than 20%. Studies with higher proportion ( $\geq 20\%$ ) are considered at <b>high</b> risk of bias.                                                                                                                                                                                                                                                                                                                                                                                                                     |
| Bias in outcome measurement                 | Studies are considered at <b>low</b> risk of bias if outcome assessment was based on a discharged diagnosis or at least on two consecutive diagnoses in outpatient clinic consultation. Studies are considered at <b>moderate</b> risk of bias if outcome assessment was based on the use of the Mini-Mental State Examination or the Geriatric Mental State Schedule, while they are still considered at low risk if this first diagnosis was confirmed with a subsequent clinical analysis. Studies are considered at <b>high</b> risk of bias if outcome assessment was based on self-report only without external validation or if information about outcome assessment was missing. |
| Bias in selection of reported results       | Studies are considered at <b>low</b> risk of bias if they reported a prior publication of the protocol or data are made available in a public and accessible repository. Studies are considered at <b>moderate</b> risk of bias if they presented outcome measures and analyses consistent with a priori plan outlined in the manuscript. Studies are considered at <b>high</b> risk of bias if no protocol was available and the a priori plan was not outlined                                                                                                                                                                                                                         |
| Overall risk of bias                        | If at least one domain was found at <b>high</b> risk of bias, the overall risk was considered <b>high</b> . If at least one domain was found at <b>moderate</b> risk of bias, the overall risk was considered <b>moderate</b> . If all domains were at <b>low</b> risk of bias, the overall risk was considered <b>low</b> .                                                                                                                                                                                                                                                                                                                                                             |

**Table S3.** Additional characteristics of the included studies.

| Reference                           | Databases                                                        | Assessment of AF and Follow-up duration                                                                                                                                                                                                                        | Exclusion criteria                                                                                                                     | Types of dementia                                  | Outcomes                                                                                        | Main findings                                                                                                                                                                                                                                                                                                                                                                                                | Adjustments                                                                                                                                                                                                                                                                                                                                               |
|-------------------------------------|------------------------------------------------------------------|----------------------------------------------------------------------------------------------------------------------------------------------------------------------------------------------------------------------------------------------------------------|----------------------------------------------------------------------------------------------------------------------------------------|----------------------------------------------------|-------------------------------------------------------------------------------------------------|--------------------------------------------------------------------------------------------------------------------------------------------------------------------------------------------------------------------------------------------------------------------------------------------------------------------------------------------------------------------------------------------------------------|-----------------------------------------------------------------------------------------------------------------------------------------------------------------------------------------------------------------------------------------------------------------------------------------------------------------------------------------------------------|
| Bunch et al. 2010 <sup>21</sup>     | Database Registry of the Intermountain Heart Collaborative Study | (ICD-9); AF: hospital discharge or admission for AF or electrocardiographic database of all 5 y Intermountain Healthcare hospitals. Dementia: medical records (ICD9)                                                                                           | incomplete medical information about dementia screening or follow-up on dementia diagnosis; prevalent dementia;                        | VaD, Senile, Alzheimer's and non-specific dementia | incidence of dementia                                                                           | AF independently associated with all types of dementia and the highest risk of AD was in the younger AF group                                                                                                                                                                                                                                                                                                | Age, sex, hypertension, hyperlipidemia, diabetes mellitus, renal failure, the smoking, family history, MI, CVA, heart failure, statin, ACE inhibitor, ARB, beta-blockers, diuretic*                                                                                                                                                                       |
| Chen et al. 2021 <sup>29</sup>      | NHIRD released by the Taiwan NHRI                                | (ICD-9-CM) AF and dementia: discharge diagnosis or more than two consecutive clinic visits; further analysis of 3.5 ± 3.4 y < 20 years AD and VaD with AD (F) 3.4 ± 3.3 (M) y (i.e., donepezil, rivastigmine, memantine and galantamine) and PET/SPECT imaging | patients with incomplete demographic data, age heart disease, hyperthyroidism, past valvular heart surgery, and a history of dementia. | Alzheimer's dementia, VaD                          | incidence of dementia stratified by age and by sex; differences between incidence of AD and VaD | higher incidence in peripheral arterial disease, renal women than in men in function status, abnormal liver function, all groups older than 55; traumatic brain injury, alcohol abuse, higher incidence in systemic thromboembolism (excluding women than in men only ischemic stroke), myocardial infarction, in the age groups between 56-85 if depression or bipolar disorder, use of considering only AD | Age, sex, monthly income (USD), urbanization level, hypertension, diabetes mellitus, ischemic heart disease, dyslipidemia, gout, COPD, dihydroxydipyrone CCB, don-dihydroxydipyrone CCB, beta-blockers, statins, DPP4 inhibitors, biguanides, sulfonylurea, thiazolidinedione, insulin                                                                    |
| de Bruijn et al. 2015 <sup>22</sup> | The Rotterdam Study                                              | AF: ECGs and hospital discharges; dementia: MMSE and GMS, subsequent interview with eventually further neuropsychological testing if dementia was suspected and, if necessary, clinical neuroimaging. Up to 20 y                                               | preexisting AF or dementia                                                                                                             | Alzheimer's dementia and overall dementia          | incidence of dementia                                                                           | atrial fibrillation is associated with an increased risk of dementia, independent of clinical stroke; association strongest in the younger                                                                                                                                                                                                                                                                   | Age, sex, diabetes mellitus, smoking, total cholesterol, high density lipoprotein cholesterol levels, lipid-lowering medication, systolic and diastolic blood pressure, blood pressure-lowering medication, BMI, educational level, ever use of oral anticoagulant medication, coronary heart disease, heart failure, apolipoprotein E ε4 carrier status. |

|                                |                                   |                                                                                                                                                                         |                                                                                     |                                                                                                                                                                                                              |                                                                                               |                                                                                                                                                                                                                                                         |                                                                                                                                                                                                                                                 |                                                                                                                                                                                                                                                                                                                                                                                                                                                                                                                                      |
|--------------------------------|-----------------------------------|-------------------------------------------------------------------------------------------------------------------------------------------------------------------------|-------------------------------------------------------------------------------------|--------------------------------------------------------------------------------------------------------------------------------------------------------------------------------------------------------------|-----------------------------------------------------------------------------------------------|---------------------------------------------------------------------------------------------------------------------------------------------------------------------------------------------------------------------------------------------------------|-------------------------------------------------------------------------------------------------------------------------------------------------------------------------------------------------------------------------------------------------|--------------------------------------------------------------------------------------------------------------------------------------------------------------------------------------------------------------------------------------------------------------------------------------------------------------------------------------------------------------------------------------------------------------------------------------------------------------------------------------------------------------------------------------|
| Kim et al. 2019 <sup>30</sup>  | Korean NHIS-HEALS database        | (ICD-10) AF: discharge diagnosis or at least confirmed twice; dementia: ICD-10 with prescription of dementia drugs (rivastigmine, galantamine, memantine, or donepezil) | AF group 96 months, IQR 86-101 months); AF-free group 93 months, IQR 84-100 months) | valvular heart disease, TIA/stroke, hemorrhagic stroke, dementia, prevalent AF                                                                                                                               | Alzheimer's dementia, VaD                                                                     | incidence of AF and dementia                                                                                                                                                                                                                            | after censoring for obstructive pulmonary disease, stroke, the cumulative incidence of dementia was higher in the incident-AF group                                                                                                             | Age, sex, hypertension, diabetes mellitus, dyslipidemia, heart failure, previous myocardial infarction, peripheral artery disease, osteoporosis, chronic kidney disease, chronic obstructive pulmonary disease, malignant neoplasm, liver disease, cardiovascular medications, economic status, alcohol consumption, smoking status, exercise habits, follow-up duration, body mass index, systolic and diastolic blood pressure, blood glucose, total cholesterol, and blood hemoglobin level.                                      |
| Kim et al. 2020 <sup>31</sup>  | Korean NHIS-Senior database       | (ICD-10) AF and dementia: ICD10 diagnosis confirmed if secondary to a hospital discharge or at least confirmed twice in outpatient department.                          | AF group 86 months, IQR 62-96 months); AF-free group 85 months, IQR 58-95 months)   | valvular heart disease (mitral stenosis or prosthetic heart valves or with insurance claims for valve replacement or valvuloplasty), ischemic stroke or TIA, hemorrhagic stroke, pre-existing dementia or AF | Alzheimer's dementia, VaD                                                                     | incidence of dementia                                                                                                                                                                                                                                   | higher incidence of dementia in AF participants, independently of stroke                                                                                                                                                                        | Age, sex, and clinical variables, including hypertension, diabetes mellitus, previous MI, heart failure, peripheral artery disease, dyslipidemia, osteoporosis, CKD, COPD, liver disease, history of malignant neoplasm, economic status, cardiovascular medications (aspirin, P2Y12 inhibitor, statin, anticoagulant, beta-blocker, ACEi or ARB, calcium channel blocker, digoxin, diuretics), body mass index, systolic and diastolic blood pressure (BP), blood glucose level, total cholesterol, and alcohol and smoking habits. |
| Liao et al. 2015 <sup>32</sup> | NHIRD released by the Taiwan NHRI | (ICD-9-CM) AF: discharge diagnosis or at least confirmed twice; dementia: registered by the physicians responsible for the treatment (medical records).                 | preexisting dementia, age <20 years old                                             | presenile and senile dementia, VaD<br><br>Alzheimer's dementia                                                                                                                                               | incidence of dementia and usefulness of CHADS2 and CHA2DS2-VASc scores in predicting dementia | the cumulative incidence of dementia was higher in the incident-AF group, even in patients without malignancy, autoimmune diseases, and use of aspirin, clopidogrel, warfarin, ACEi/ARB, statin, Charlson index scores higher in patients with dementia | Age, sex, hypertension, diabetes mellitus, heart failure, vascular diseases, CVA, ESRD, COPD, malignancy, autoimmune diseases, the use of aspirin, clopidogrel, warfarin, ACEi/ARB, statin, Charlson index, income level, and systemic diseases |                                                                                                                                                                                                                                                                                                                                                                                                                                                                                                                                      |



**Abbreviations:** ACEi: angiotensin-converting enzyme inhibitor; AD: Alzheimer's dementia; AF: atrial fibrillation; ARB: angiotensin II-receptor blocker; CKD: chronic kidney disease; COPD: chronic obstructive pulmonary disease; CVA: cerebral vascular accident; CHADS2: Congestive heart failure, Hypertension, Age >75 years, Diabetes mellitus, prior Stroke 2 or transient ischemic attack, or thromboembolism; ESRD: end-stage renal disease; ICD: International Classification of Diseases; MI: myocardial infarction; NHIRD: National Health Insurance Research Database; NHRI: National Health Research Institutes; NR: not reported; TIA: transient ischemic stroke; VaD: vascular dementia.

Note: \*data obtained from Table 1 of the original study <sup>20</sup>.

**Table S4.** Risk of bias assessment of the included studies.

| Reference                           | Bias due to confounding | Bias in selecting participants in the study | Bias in exposure classification | Bias in departure from intended exposure | Bias due to missing data | Bias in outcome measurement | Bias in selection of reported results | Overall risk of bias |
|-------------------------------------|-------------------------|---------------------------------------------|---------------------------------|------------------------------------------|--------------------------|-----------------------------|---------------------------------------|----------------------|
| Bunch et al. 2010 <sup>21</sup>     | Moderate                | Low                                         | Low                             | Low                                      | Low                      | Low                         | Low                                   | Moderate             |
| Chen et al. 2021 <sup>29</sup>      | Moderate                | Low                                         | Low                             | Low                                      | Low                      | Low                         | Low                                   | Moderate             |
| de Bruijn et al. 2015 <sup>22</sup> | Low                     | Low                                         | Low                             | Low                                      | Low                      | Low                         | Low                                   | Low                  |
| Kim et al. 2019 <sup>30</sup>       | Moderate                | Low                                         | Low                             | Low                                      | Low                      | Low                         | Low                                   | Moderate             |
| Kim et al. 2020 <sup>31</sup>       | Moderate                | Low                                         | Low                             | Low                                      | Low                      | Low                         | Low                                   | Moderate             |
| Liao et al. 2015 <sup>32</sup>      | Moderate                | Low                                         | Low                             | Low                                      | Low                      | Low                         | Low                                   | Moderate             |

**Figure S1.** Forest plot for risk of early-onset (<70 years) dementia in association to atrial fibrillation; sensitivity analysis after exclusion of Chen et al. 2021 study.<sup>29</sup> AD, Alzheimer’s dementia; F, female; M, male; ND, Nonspecified dementia; SDm, senile dementia; VaD, vascular dementia.

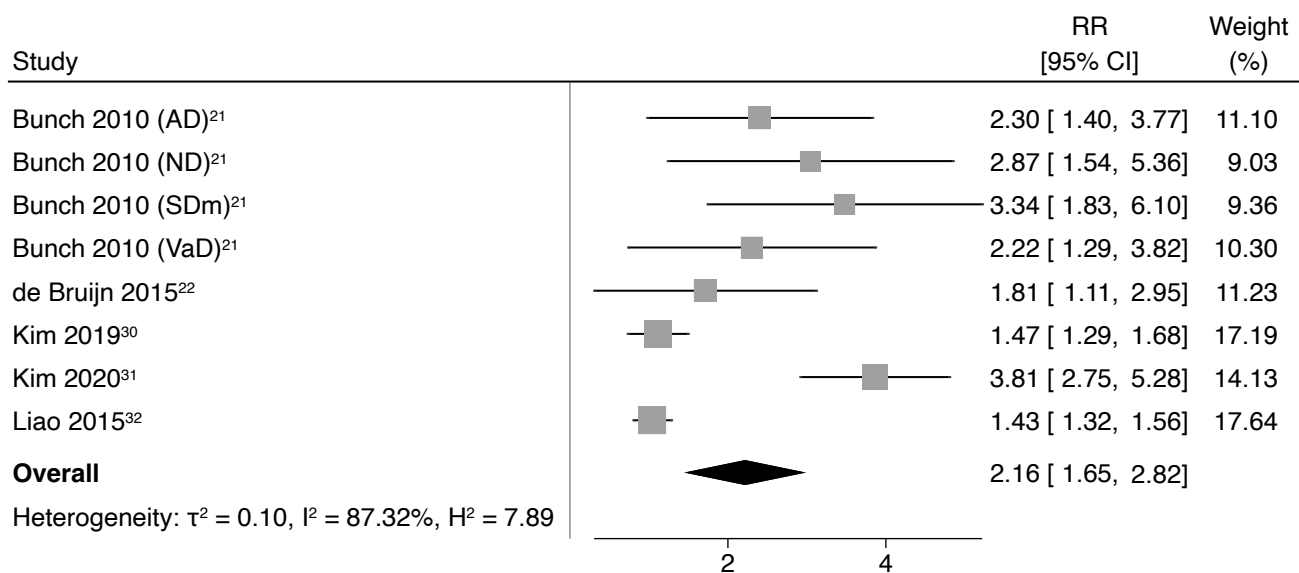

Random-effects model based on Paule and Mandel method-ebayes option

**Figure S2.** Forest plot for risk of early-onset (<70 years) dementia in association to atrial fibrillation; sensitivity analysis stratified by certainty of EOD diagnosis: dementia onset before 65 years (EOD subgroup 1) and unclear exact age of onset (EOD subgroup 2). AD, Alzheimer’s dementia; F, female; M, male; ND, Nonspecified dementia; SDm, senile dementia; VaD, vascular dementia.

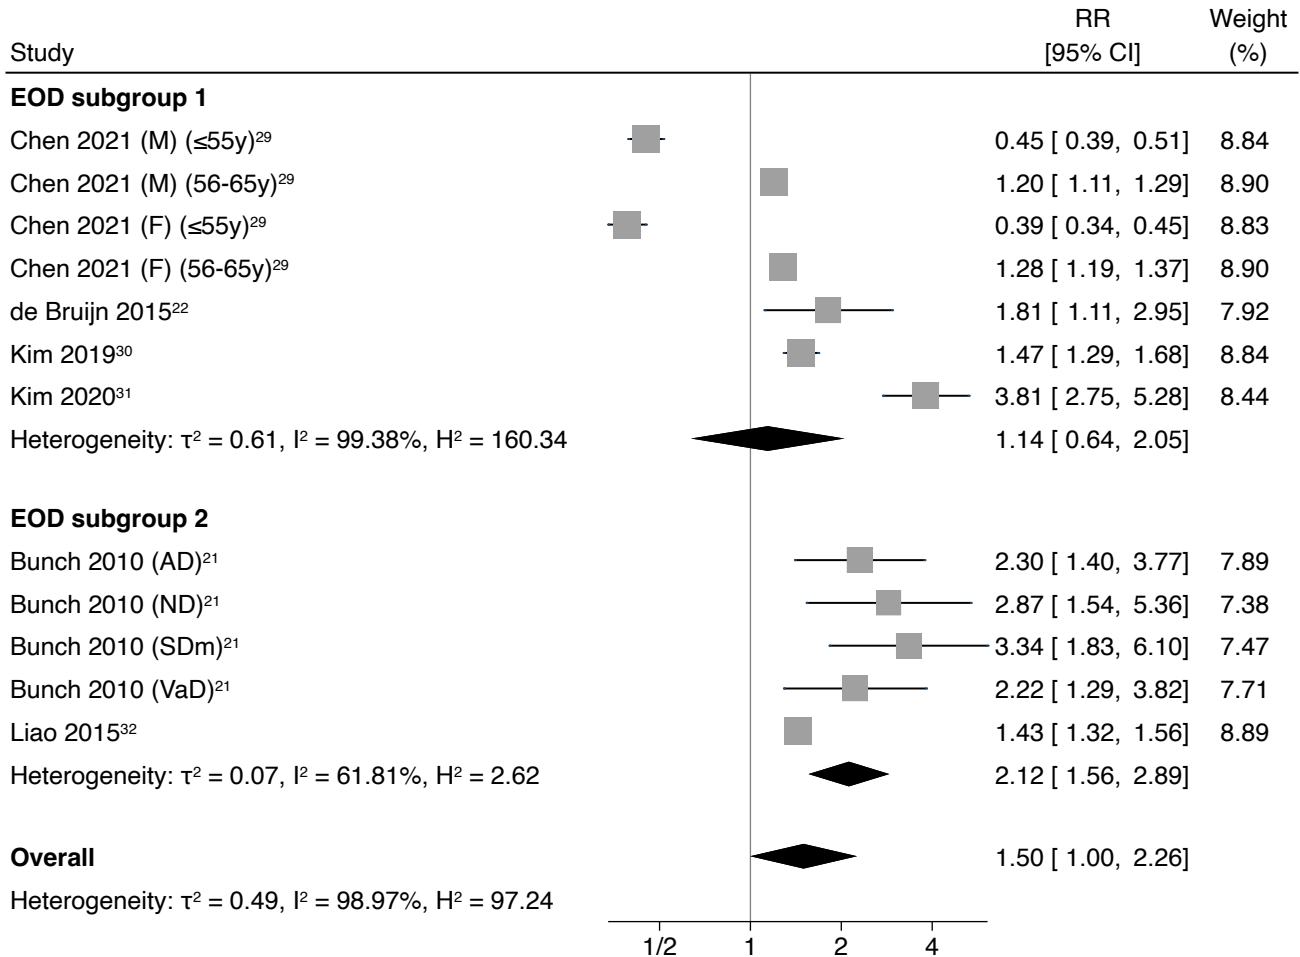

Random-effects model based on Paule and Mandel method-ebayes option
